# Supplementary material
Source: publisher site journal article supplement (https://www.dovepress.com/article/517775)
Supplement: Supplementary file 1 [file 517775-Supplementary-Tables-1-3_1.docx]

**Table S1 Serum lipid indexes between gestational diabetes mellitus and control group stratified by stages of pregnancy**

|  | **1st OR 2nd trimester** | | | |  | **1st trimester** | | | |  | **2nd trimester** | | | |
| --- | --- | --- | --- | --- | --- | --- | --- | --- | --- | --- | --- | --- | --- | --- |
| **Variables** | **GDM**  **N (%)** | **Control group**  **N (%)** | ***χ2*** | ***P*** |  | **GDM**  **N (%)** | **Control group**  **N (%)** | ***χ2*** | ***P*** |  | **GDM**  **N (%)** | **Control group**  **N (%)** | ***χ2*** | ***P*** |
| **TG (mmol/L)** |  |  | 121.63 | <0.0001 |  |  |  | 65.31 | <0.0001 |  |  |  | 89.66 | <0.0001 |
| Q1 | 419(25.39) | 1231(74.61) |  |  |  | 271(25.57) | 789(74.43) |  |  |  | 147(22.24) | 514(77.76) |  |  |
| Q2 | 448(26.29) | 1256(73.71) |  |  |  | 296(27.61) | 776(72.39) |  |  |  | 204(30.63) | 462(69.37) |  |  |
| Q3 | 514(31.50) | 1118(68.50) |  |  |  | 311(29.88) | 730(70.12) |  |  |  | 218(34.17) | 420(65.83) |  |  |
| Q4 | 673(41.21) | 960(58.79) |  |  |  | 428(40.45) | 630(59.55) |  |  |  | 299(46.57) | 343(53.43) |  |  |
| Median (P25, P75) | 1.50(1.33,1.99) | 1.33(1.04,1.70) | − | <0.0001 |  | 1.33(1.02,1.74) | 1.20(0.95,1.52) | − | <0.0001 |  | 1.82(1.45,2.35) | 1.58(1.27,2.01) | − | <0.0001 |
| **TC (mmol/L)** |  |  | 10.70 | 0.0135 |  |  |  | 15.97 | 0.0011 |  |  |  | 3.61 | 0.3062 |
| Q1 | 469(28.60) | 1171(71.40) |  |  |  | 288(26.94) | 781(73.06) |  |  |  | 213(32.67) | 439(67.33) |  |  |
| Q2 | 499(29.84) | 1173(70.16) |  |  |  | 310(29.50) | 741(70.50) |  |  |  | 212(32.27) | 445(67.73) |  |  |
| Q3 | 548(32.91) | 1117(67.09) |  |  |  | 363(34.05) | 703(65.95) |  |  |  | 207(31.94) | 441(68.06) |  |  |
| Q4 | 538(32.76) | 1104(67.24) |  |  |  | 345(33.01) | 700(66.99) |  |  |  | 236(36.31) | 414(63.69) |  |  |
| Median (P25, P75) | 4.57(4.08,5.12) | 4.50(4.01,5.07) | − | 0.0022 |  | 4.42(3.97,4.88) | 4.31(3.86,4.82) | − | 0.0002 |  | 4.94(4.36,5.57) | 4.90(4.35,5.47) | − | 0.1152 |
| **HDL-C (mmol/L)** |  |  | 51.14 | <0.0001 |  |  |  | 34.58 | <0.0001 |  |  |  | 25.26 | <0.0001 |
| Q1 | 613(36.88) | 1049(63.12) |  |  |  | 386(36.28) | 678(63.72) |  |  |  | 276(41.01) | 397(58.99) |  |  |
| Q2 | 550(32.58) | 1138(67.42) |  |  |  | 359(33.46) | 714(66.54) |  |  |  | 207(32.09) | 438(67.91) |  |  |
| Q3 | 454(28.02) | 1166(71.98) |  |  |  | 288(27.35) | 765(72.65) |  |  |  | 195(29.86) | 458(70.14) |  |  |
| Q4 | 437(26.50) | 1212(73.50) |  |  |  | 273(26.22) | 768(73.78) |  |  |  | 190(29.87) | 446(70.13) |  |  |
| Median (P25, P75) | 1.63(1.42,1.87) | 1.70(1.48,1.93) | − | <0.0001 |  | 1.58(1.38,1.81) | 1.65(1.44,1.87) | − | <0.0001 |  | 1.73(1.50,1.99) | 1.79(1.59,2.02) | − | <0.0001 |
| **LDL-C (mmol/L)** |  |  | 38.97 | <0.0001 |  |  |  | 40.08 | <0.0001 |  |  |  | 6.99 | 0.0722 |
| Q1 | 426(25.65) | 1235(74.35) |  |  |  | 258(23.74) | 829(76.26) |  |  |  | 214(32.57) | 443(67.43) |  |  |
| Q2 | 509(30.85) | 1141(69.15) |  |  |  | 323(31.33) | 708(68.67) |  |  |  | 197(30.64) | 446(69.36) |  |  |
| Q3 | 531(32.14) | 1121(67.86) |  |  |  | 353(32.81) | 723(67.19) |  |  |  | 216(32.68) | 445(67.32) |  |  |
| Q4 | 588(35.51) | 1068(64.49) |  |  |  | 372(35.87) | 665(64.13) |  |  |  | 241(37.31) | 405(62.69) |  |  |
| Median (P25, P75) | 2.57(2.20,2.97) | 2.48(2.08,2.87) | − | <0.0001 |  | 2.40(2.04,2.77) | 2.48(2.16,2.85) | − | <0.0001 |  | 2.76(2.30,3.25) | 2.70(2.29,3.15) | − | 0.0812 |

Note: continuous variables were presented as medium (P25, P75); categorical variables were presented with count (percentage).

**Table S2 Multivariable analysis between serum lipid indexes and gestational diabetes mellitus stratified by stages of pregnancy**

|  | **1st OR 2nd trimester** | |  | **1st trimester** | |  | **2nd trimester** | |
| --- | --- | --- | --- | --- | --- | --- | --- | --- |
| **Variables** | **Unadjusted model**  **OR(95% CI)** | **Adjusted modela**  **OR(95% CI)** |  | **Unadjusted model**  **OR(95% CI)** | **Adjusted modela**  **OR(95% CI)** |  | **Unadjusted model**  **OR(95% CI)** | **Adjusted modela**  **OR(95% CI)** |
| **TG (mmol/L)** |  |  |  |  |  |  |  |  |
| Q1 | 1.00 | 1.00 |  | 1.00 | 1.00 |  | 1.00 | 1.00 |
| Q2 | 1.05(0.90,1.22) | 0.99(0.84,1.17) |  | 1.11(0.92,1.35) | 1.00(0.81,1.23) |  | **1.54(1.21,1.98)** | **1.44(1.11,1.88)** |
| Q3 | **1.35(1.16,1.57)** | **1.22(1.03,1.43)** |  | **1.24(1.02,1.50)** | 1.08(0.88,1.32) |  | **1.82(1.42,2.32)** | **1.55(1.19,2.02)** |
| Q4 | **2.06(1.78,2.39)** | **1.61(1.36,1.89)** |  | **1.98(1.64,2.38)** | **1.38(1.13,1.70)** |  | **3.05(2.40,3.88)** | **2.41(1.85,3.13)** |
| **TC (mmol/L)** |  |  |  |  |  |  |  |  |
| Q1 | 1.00 | 1.00 |  | 1.00 | 1.00 |  | 1.00 | 1.00 |
| Q2 | 1.06(0.91,1.23) | 1.12(0.95,1.32) |  | 1.13(0.94,1.37) | 1.15(0.94,1.41) |  | 0.98(0.78,1.24) | 1.15(0.89,1.49) |
| Q3 | **1.23(1.06,1.42)** | **1.34(1.14,1.57)** |  | **1.40(1.16,1.69)** | **1.51(1.23,1.84)** |  | 0.97(0.77,1.22) | 1.09(0.84,1.40) |
| Q4 | **1.22(1.05,1.41)** | **1.30(1.11,1.53)** |  | **1.34(1.11,1.61)** | **1.28(1.04,1.56)** |  | 1.18(0.94,1.48) | **1.37(1.07,1.77)** |
| **HDL-C (mmol/L)** |  |  |  |  |  |  |  |  |
| Q1 | 1.00 | 1.00 |  | 1.00 | 1.00 |  | 1.00 | 1.00 |
| Q2 | **0.83(0.72,0.95)** | 1.04(0.89,1.21) |  | 0.88(0.74,1.06) | 1.08(0.89,1.31) |  | **0.68(0.54,0.85)** | 0.88(0.69,1.13) |
| Q3 | **0.67(0.58,0.77)** | 0.91(0.78,1.08) |  | **0.66(0.55,0.80)** | 0.91(0.74,1.11) |  | **0.61(0.49,0.77)** | 0.82(0.64,1.06) |
| Q4 | **0.62(0.53,0.72)** | 0.94(0.80,1.11) |  | **0.62(0.52,0.75)** | 0.92(0.75,1.13) |  | **0.61(0.49,0.77)** | 0.89(0.69,1.14) |
| **LDL-C (mmol/L)** |  |  |  |  |  |  |  |  |
| Q1 | 1.00 | 1.00 |  | 1.00 | 1.00 |  | 1.00 | 1.00 |
| Q2 | **1.29(1.11,1.51)** | **1.27(1.08,1.50)** |  | **1.47(1.21,1.78)** | **1.39(1.13,1.70)** |  | 0.91(0.72,1.16) | 0.91(0.70,1.17) |
| Q3 | **1.37(1.18,1.60)** | **1.33(1.13,1.57)** |  | **1.57(1.30,1.90)** | **1.44(1.18,1.77)** |  | 1.01(0.80,1.27) | 1.08(0.84,1.38) |
| Q4 | **1.60(1.38,1.85)** | **1.53(1.30,1.80)** |  | **1.80(1.49,2.17)** | **1.57(1.28,1.92)** |  | 1.23(0.98,1.55) | 1.28(1.00,1.64) |

aAdjusted for age, pre-pregnancy BMI, gestational weight gain, family history of diabetes, IVF, fasting blood glucose, and parity history. Bold represent for *P*<0.05.

**Table S3 Multivariable analysis between atherogenic indexes, remnant cholesterol and gestational diabetes mellitus stratified by stages of pregnancy**

|  | **1st trimester** | |  | **2nd trimester** | |
| --- | --- | --- | --- | --- | --- |
| **Variables** | **Unadjusted model**  **OR(95% CI)** | **Adjusted modela**  **OR(95% CI)** |  | **Unadjusted model**  **OR(95% CI)** | **Adjusted modela**  **OR(95% CI)** |
| **TG/HDL-C ratio** |  |  |  |  |  |
| Q1 | 1.00 | 1.00 |  | 1.00 | 1.00 |
| Q2 | **1.29(1.06,1.57)** | 1.14(0.93,1.41) |  | 1.19(0.92,1.52) | 1.10(0.84,1.44) |
| Q3 | **1.51(1.25,1.84)** | **1.24(1.01,1.53)** |  | **1.94(1.52,2.46)** | **1.61(1.24,2.09)** |
| Q4 | **2.31(1.92,2.79)** | **1.47(1.19,1.82)** |  | **2.86(2.25,3.62)** | **2.05(1.58,2.67)** |
| **TC/HDL-C ratio** |  |  |  |  |  |
| Q1 | 1.00 | 1.00 |  | 1.00 | 1.00 |
| Q2 | **1.34(1.10,1.63)** | **1.26(1.02,1.55)** |  | **1.49(1.17,1.90)** | **1.39(1.07,1.81)** |
| Q3 | **1.70(1.40,2.06)** | **1.41(1.15,1.74)** |  | **1.55(1.22,1.96)** | **1.37(1.06,1.78)** |
| Q4 | **2.19(1.81,2.64)** | **1.48(1.20,1.82)** |  | **2.06(1.63,2.61)** | **1.58(1.21,2.05)** |
| **LDL-C/HDL-C ratio** |  |  |  |  |  |
| Q1 | 1.00 | 1.00 |  | 1.00 | 1.00 |
| Q2 | **1.47(1.21,1.79)** | **1.37(1.11,1.69)** |  | **1.34(1.06,1.70)** | **1.32(1.02,1.70)** |
| Q3 | **1.63(1.35,1.98)** | **1.41(1.15,1.74)** |  | **1.40(1.10,1.77)** | **1.33(1.03,1.71)** |
| Q4 | **2.26(1.87,2.73)** | **1.54(1.25,1.90)** |  | **1.65(1.31,2.09)** | **1.37(1.06,1.78)** |
| **Remnant cholesterol** |  |  |  |  |  |
| Q1 | 1.00 | 1.00 |  | 1.00 | 1.00 |
| Q2 | **1.37(1.13,1.66)** | 1.22(1.00,1.50) |  | 1.22(0.96,1.55) | 1.18(0.91,1.53) |
| Q3 | **1.47(1.21,1.77)** | 1.13(0.92,1.38) |  | **1.39(1.10,1.76)** | 1.17(0.91,1.52) |
| Q4 | **1.73(1.43,2.08)** | **1.28(1.05,1.58)** |  | **2.04(1.62,2.57)** | **1.67(1.30,2.16)** |

aAdjusted for age, pre-pregnancy BMI, gestational weight gain, family history of diabetes, IVF, fasting blood glucose, and parity history. Bold represent for *P*<0.05.
